# Supplementary material
Source: MDPI journal article supplement (https://www.mdpi.com/2075-4701/11/10/1606)
Supplement: s1 [file s1 › metals-1358360-supplementary.pdf]

## Article

# Variability of the Ball Mill Bond's Standard Test in a Ta Ore Due to the Lack of Standardization

Gloria González García <sup>1</sup>, Alfredo L. Coello-Velázquez <sup>2</sup>, Begoña Fernández Pérez <sup>1</sup>  
and Juan M. Menéndez-Aguado <sup>1,\*</sup>

<sup>1</sup> Escuela Politécnica de Mieres, Universidad de Oviedo, C/Gonzalo Gutiérrez Quirós, 33600 Mieres, Asturias, Spain; gloria.glez.gcia@gmail.com (G.G.G.), fernandezbegona@uniovi.es (B.F.P.)

<sup>2</sup> CETAM, Universidad de Moa Dr. Antonio Núñez Jiménez, Moa, 83300, Cuba; acoello@ismm.edu.cu

\* Correspondence: maguado@uniovi.es; Tel.: +34 985458033

**Citation:** García, G.G.; Coello-Velázquez, A.; Pérez, B.F.; Menéndez-Aguado, J.M. Variability of the Ball Mill Bond's Standard Test in a Ta Ore Due to the Lack of Standardization. *Metals* **2021**, *11*, 1606. <https://doi.org/10.3390/met11101606>

Academic Editors: Giovanni Principi and Antoni Roca

Received: 12 August 2021

Accepted: 5 October 2021

Published: 9 October 2021

**Publisher's Note:** MDPI stays neutral with regard to jurisdictional claims in published maps and institutional affiliations.

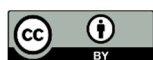

**Copyright:** © 2021 by the authors. Licensee MDPI, Basel, Switzerland. This article is an open access article distributed under the terms and conditions of the Creative Commons Attribution (CC BY) license (<http://creativecommons.org/licenses/by/4.0/>).

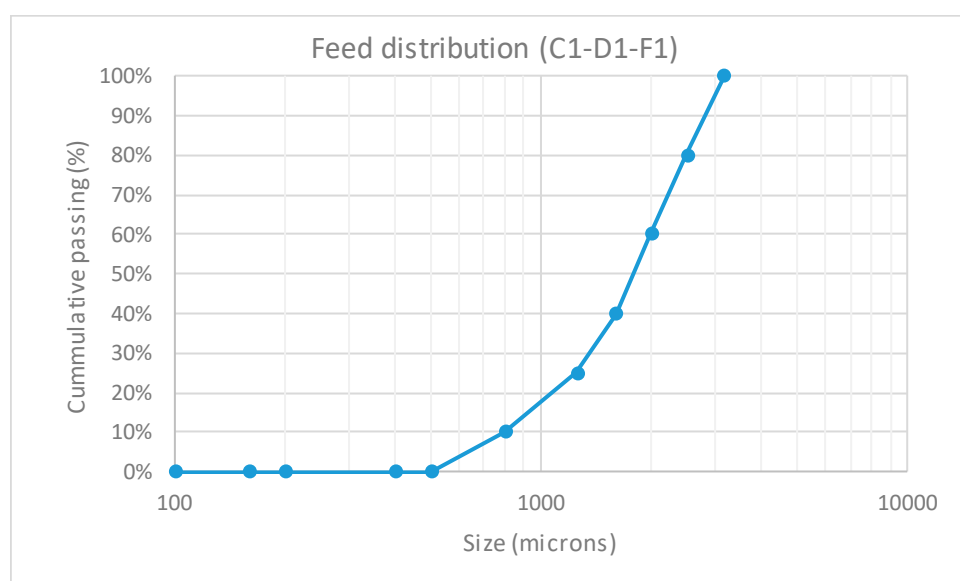

**Figure S1.** Feed PSD, test C1-D1-F1.

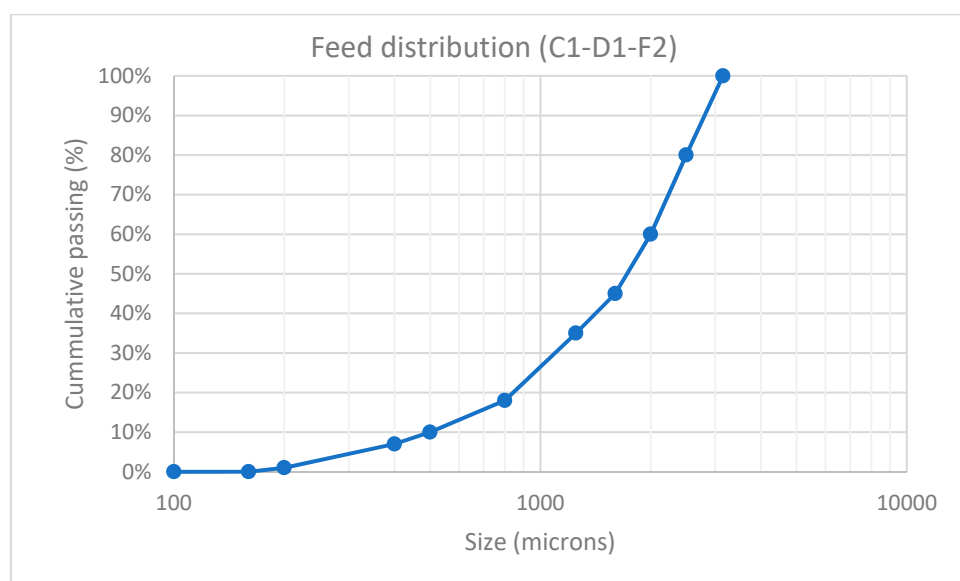

**Figure S2.** Feed PSD, test C1-D1-F2.

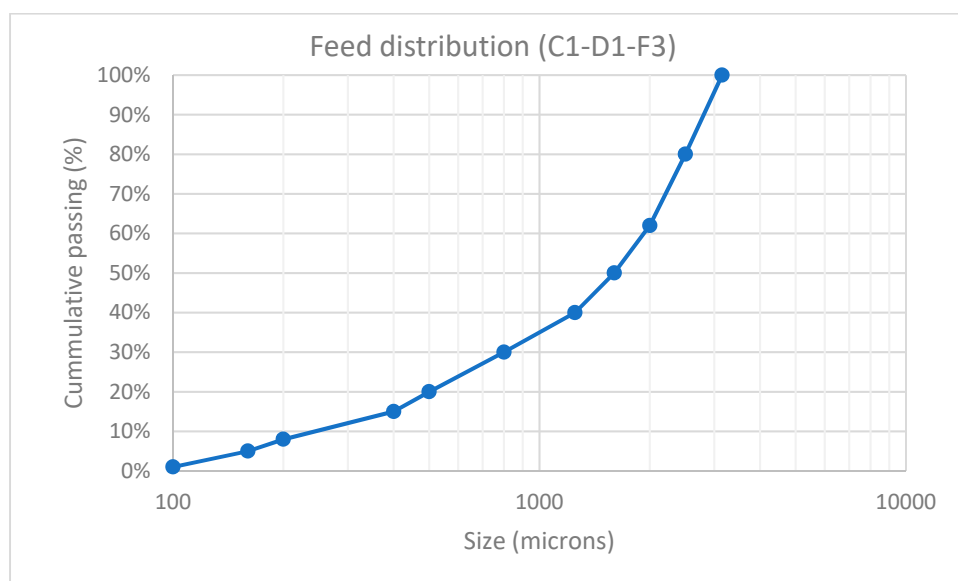

**Figure S3.** Feed PSD, test C1-D1-F3.

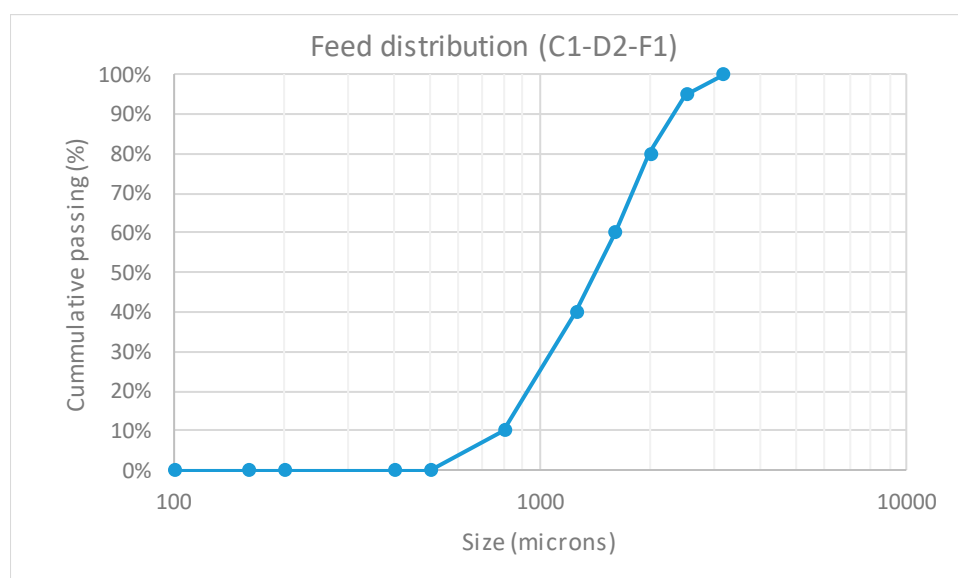

**Figure S4.** Feed PSD, test C1-D2-F1.

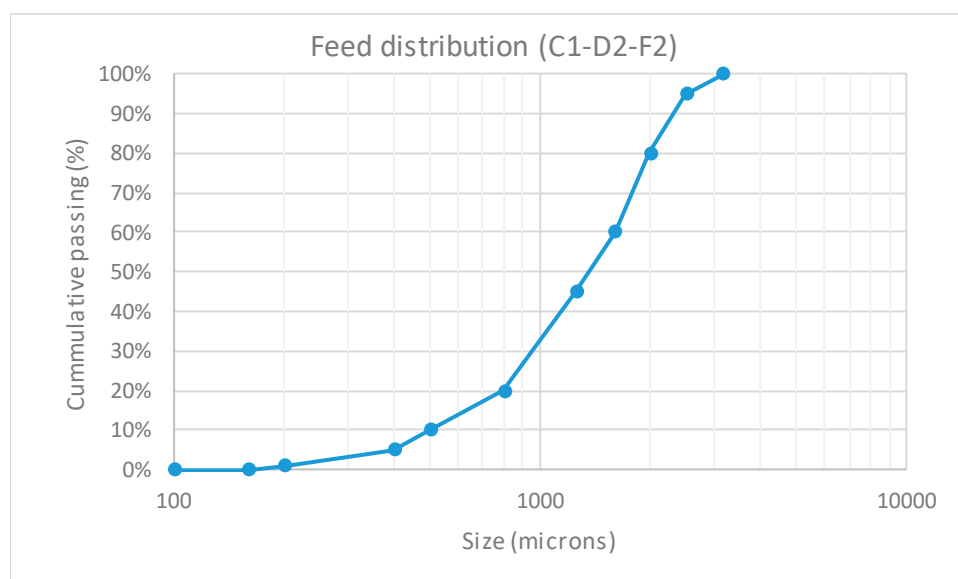

**Figure S5.** Feed PSD, test C1-D2-F2.

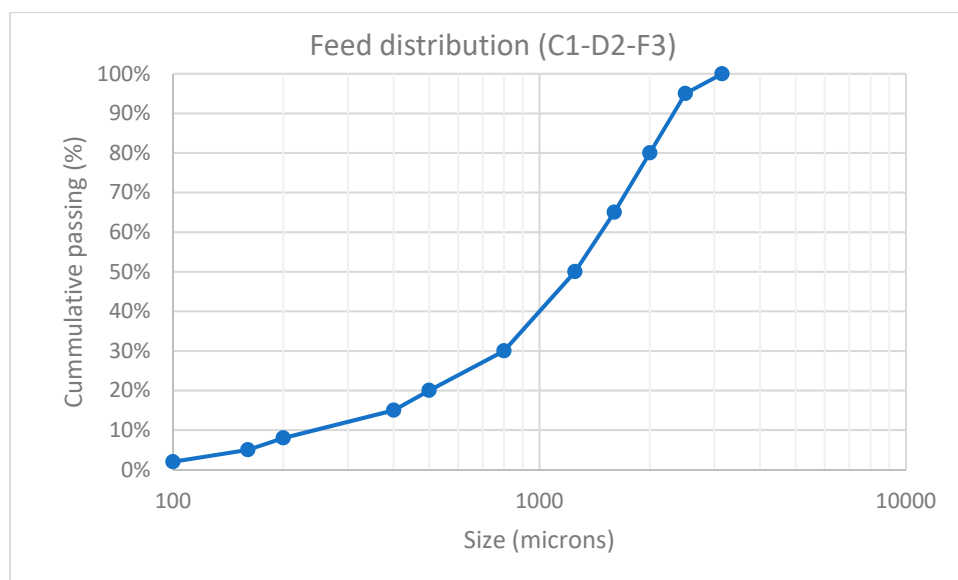

**Figure S6.** Feed PSD, test C1-D2-F3.

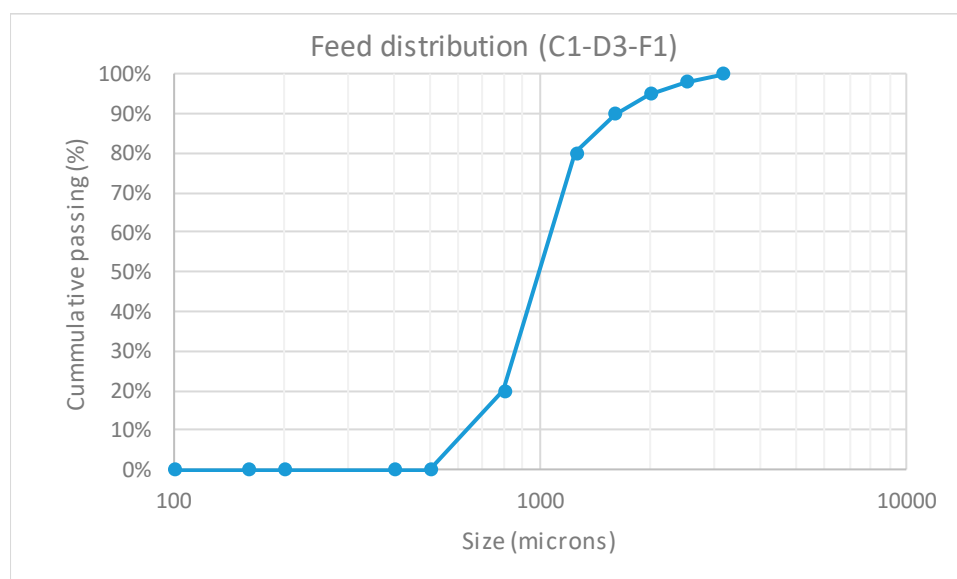

**Figure S7.** Feed PSD, test C1-D3-F1.

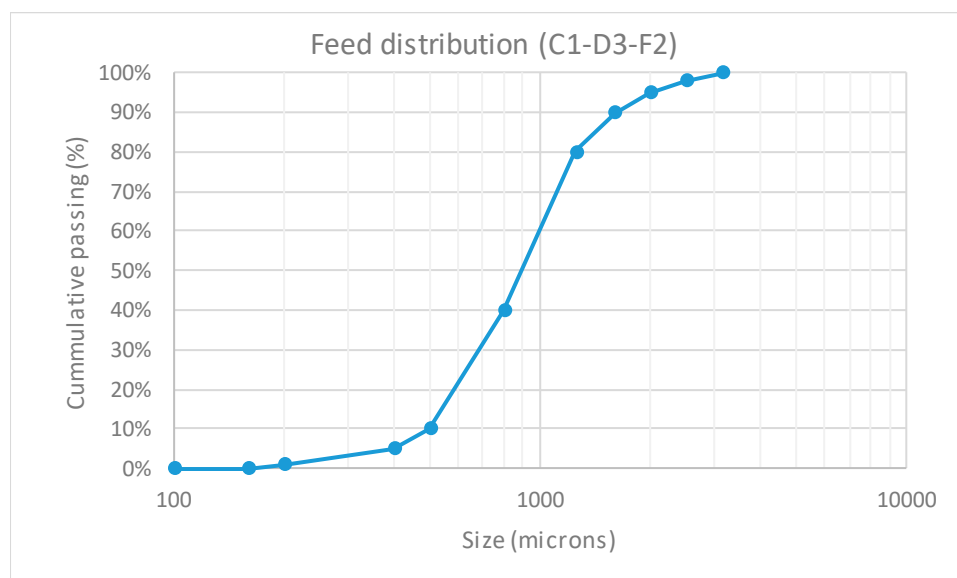

**Figure S8.** Feed PSD, test C1-D3-F2.

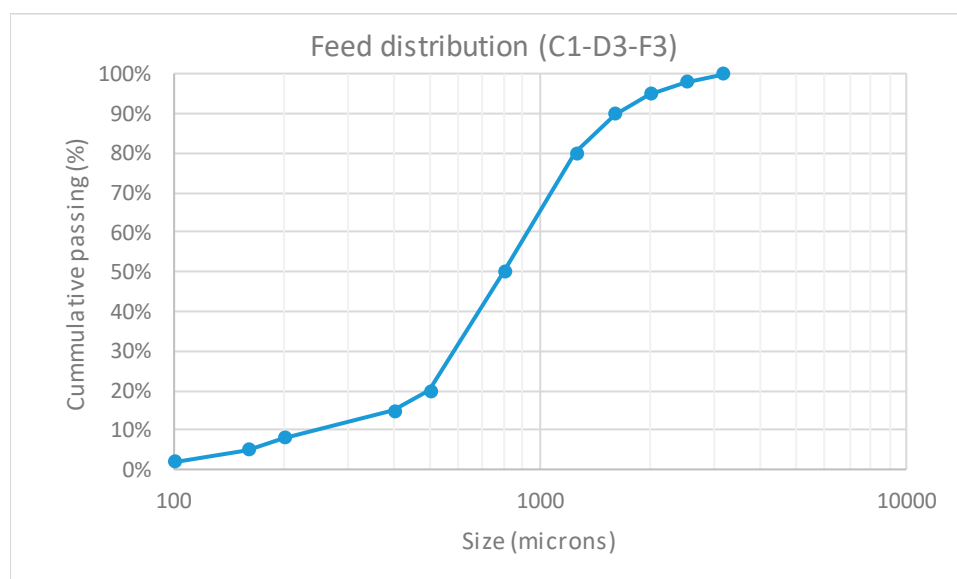

**Figure S9.** Feed PSD, test C1-D3-F3.

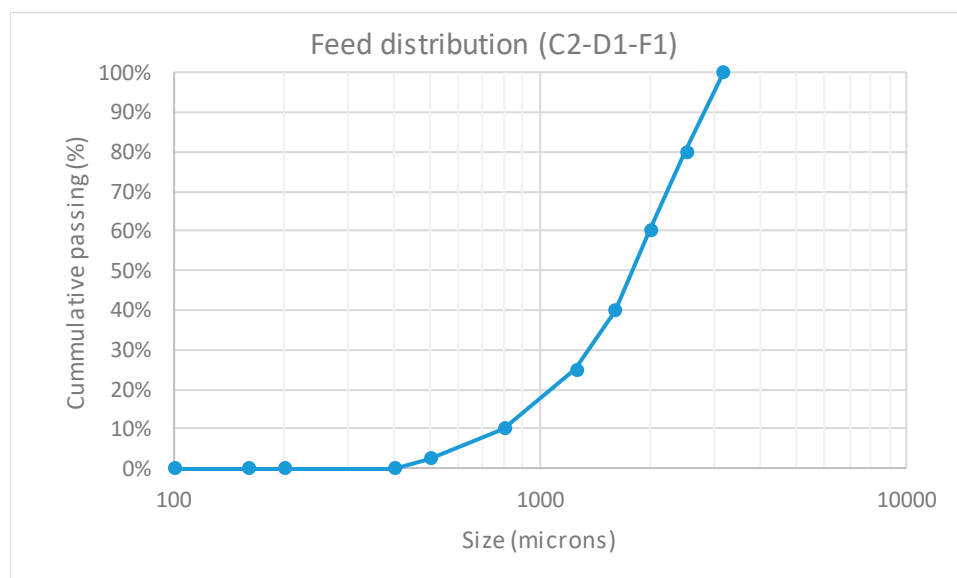

**Figure S10.** Feed PSD, test C2-D1-F1.

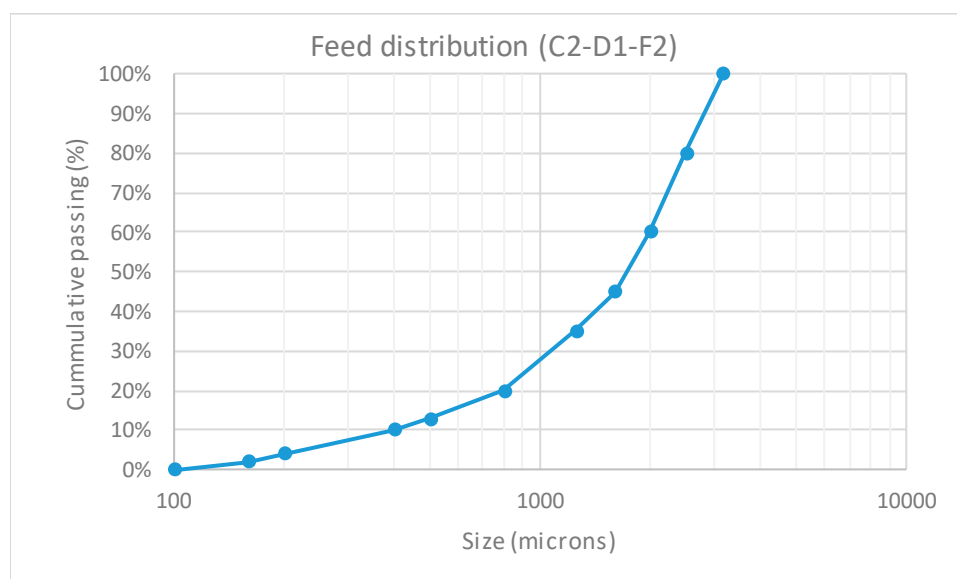

**Figure S11.** Feed PSD, test C2-D1-F2.

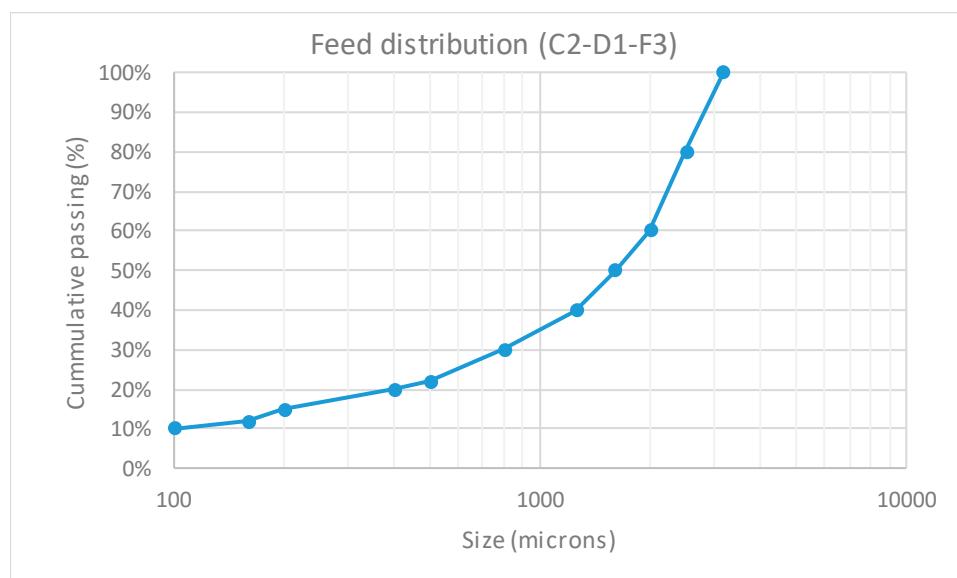

**Figure S12.** Feed PSD, test C2-D1-F3.

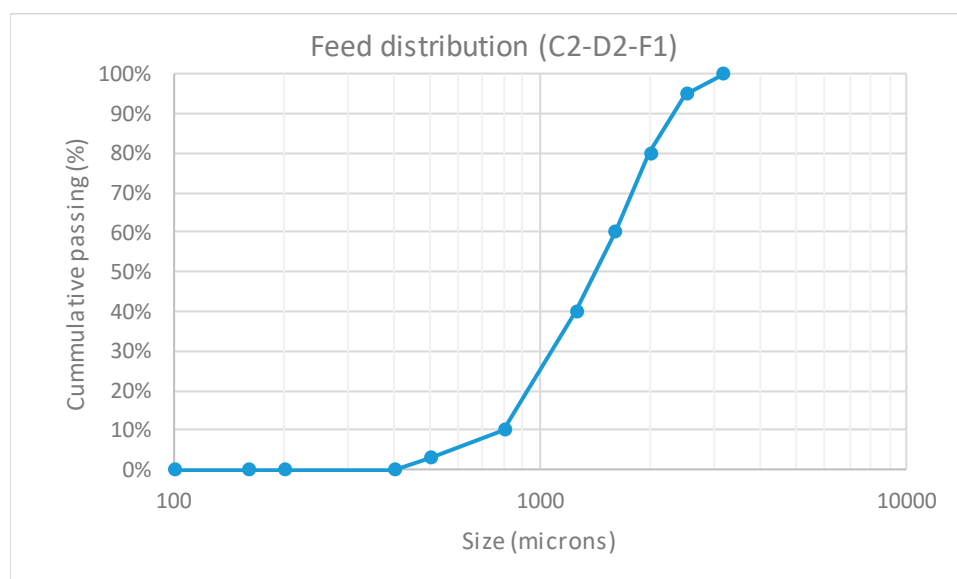

**Figure S13.** Feed PSD, test C2-D2-F1.

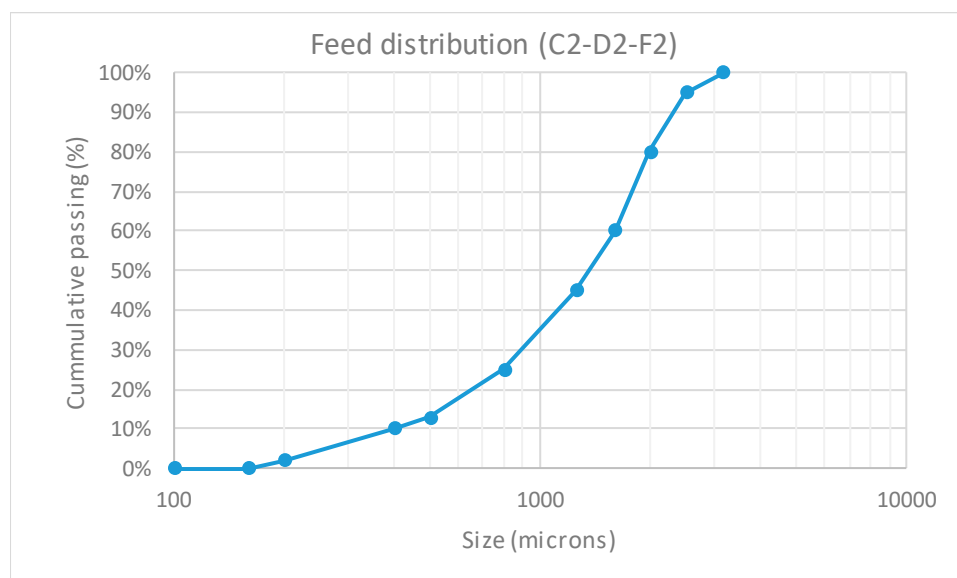

**Figure S14.** Feed PSD, test C2-D2-F2.

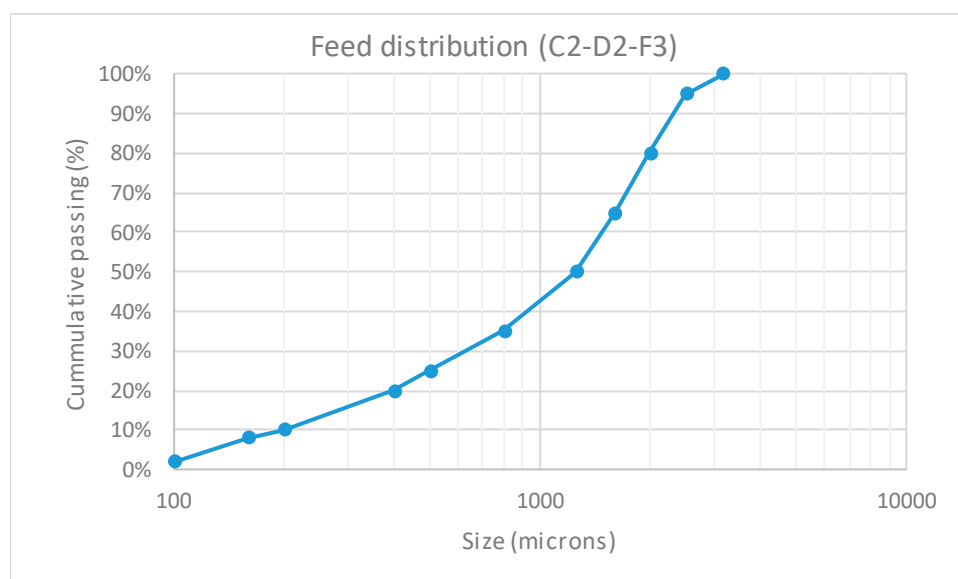

**Figure S15.** Feed PSD, test C2-D2-F3.

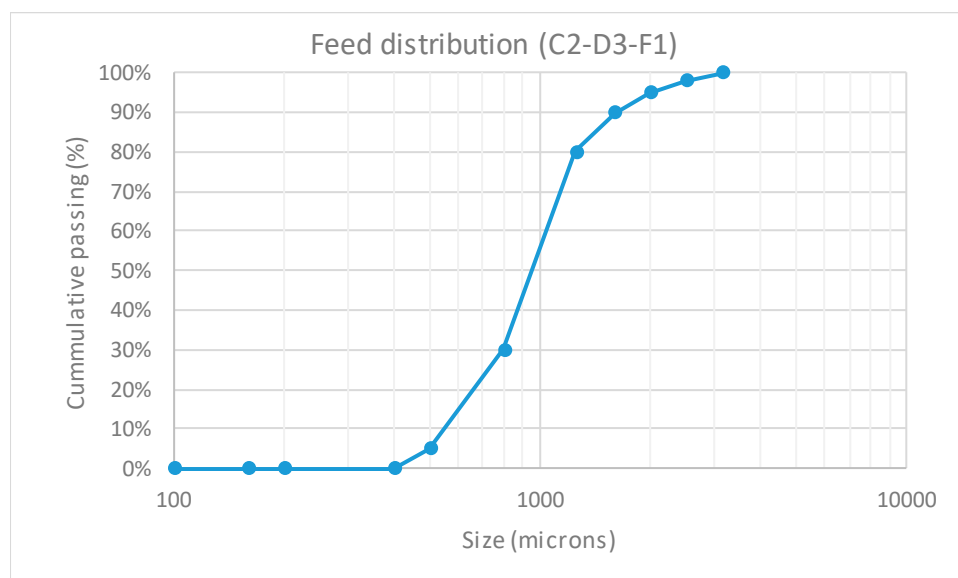

**Figure S16.** Feed PSD, test C2-D3-F1.

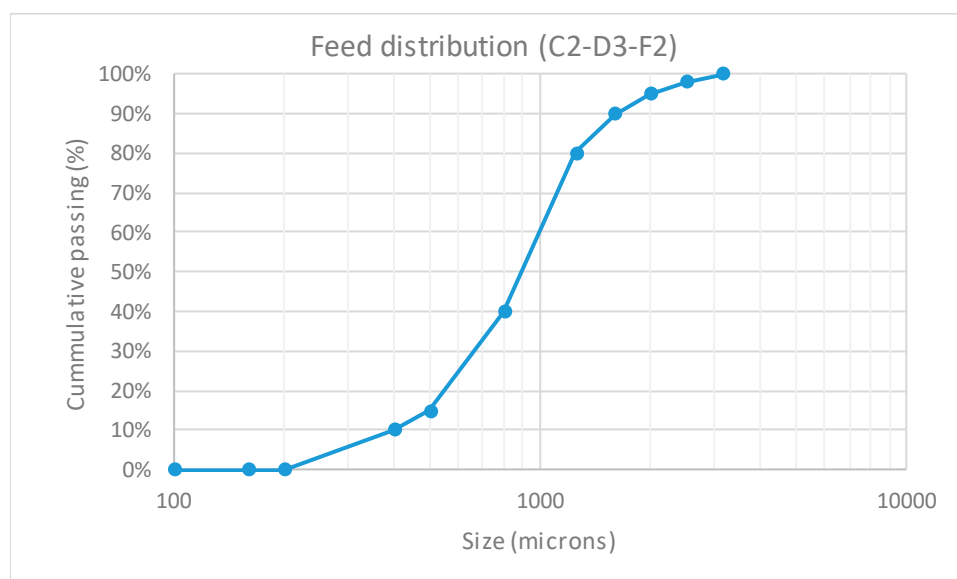

**Figure S17.** Feed PSD, test C2-D3-F2.

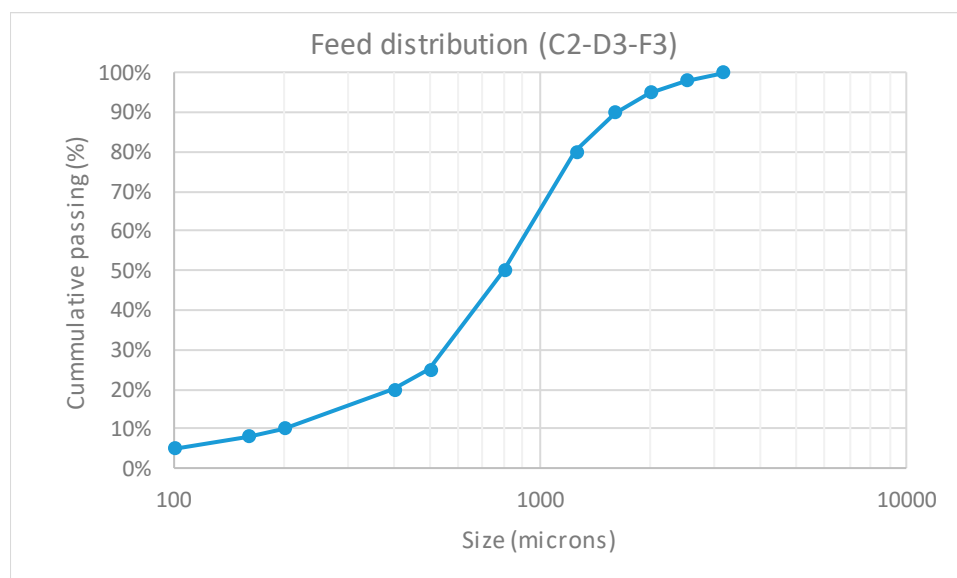

**Figure S18.** Feed PSD, test C2-D3-F3.

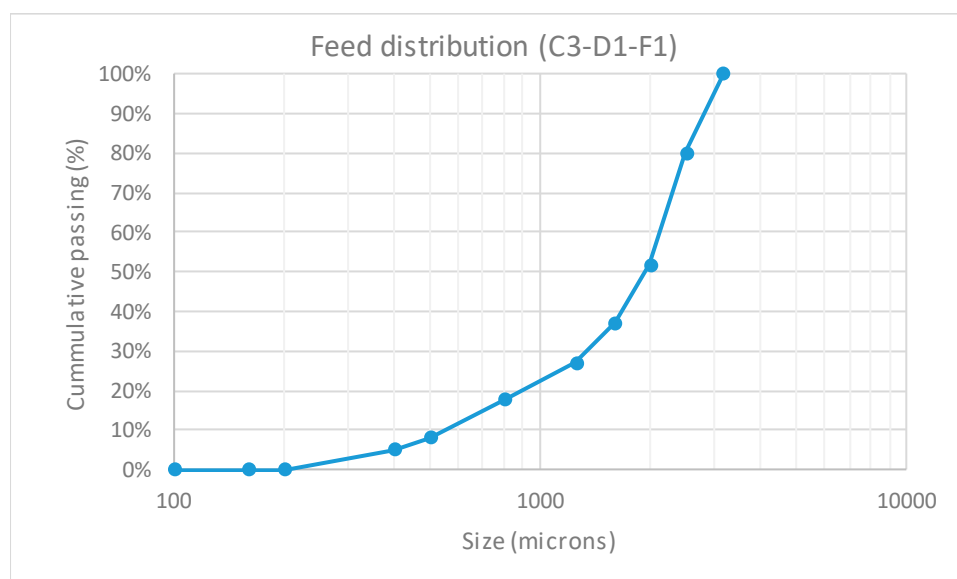

**Figure S19.** Feed PSD, test C3-D1-F1.

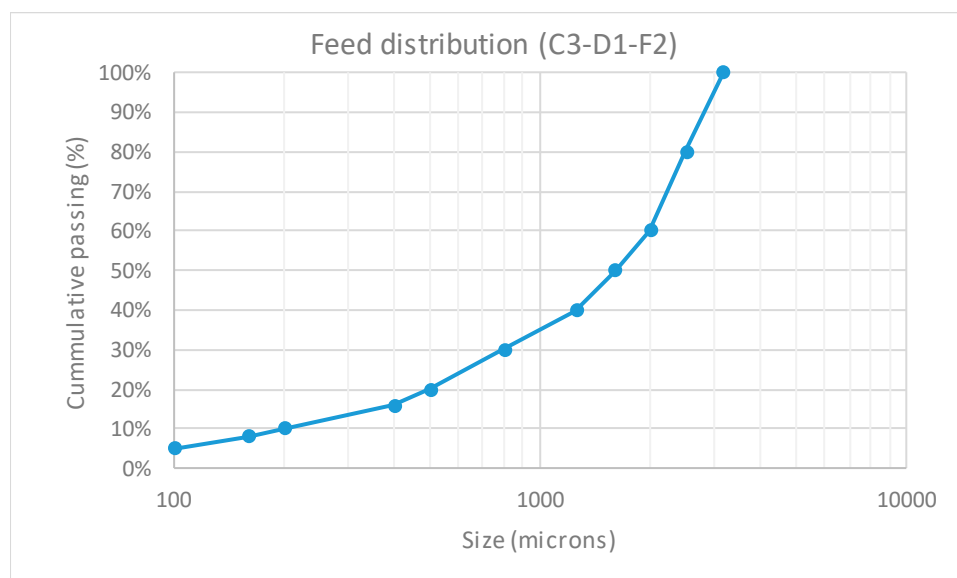

**Figure S20.** Feed PSD, test C3-D1-F2.

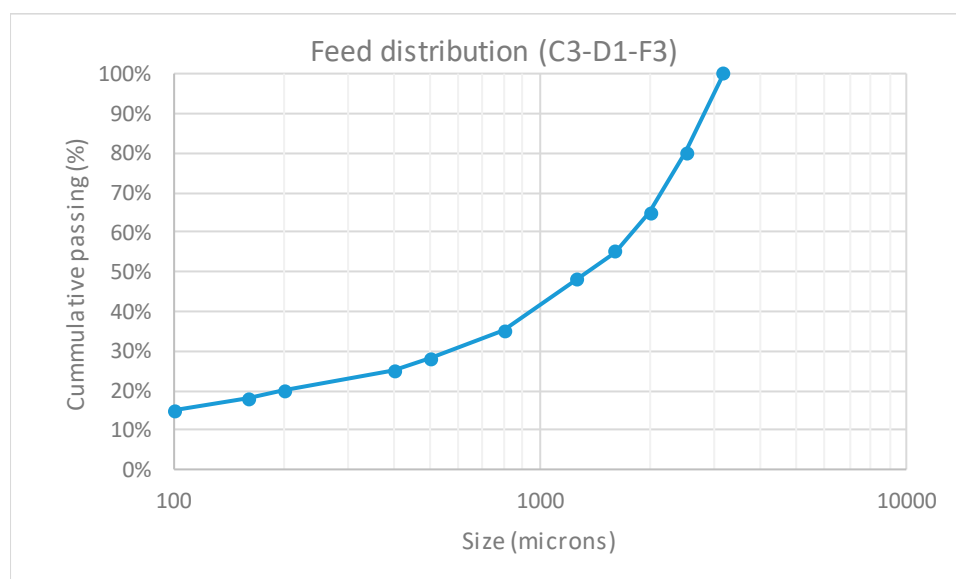

**Figure S21.** Feed PSD, test C3-D1-F3.

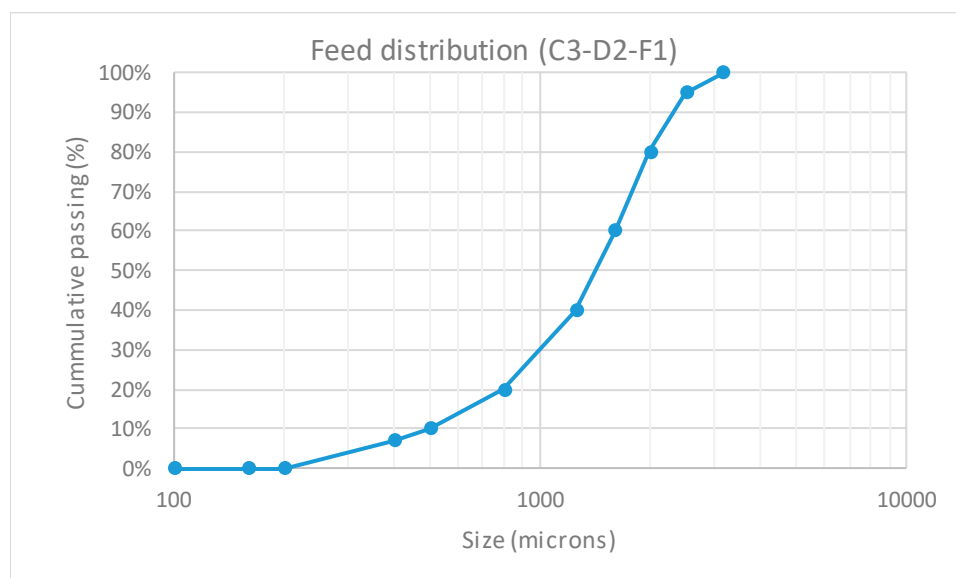

**Figure S22.** Feed PSD, test C3-D2-F1.

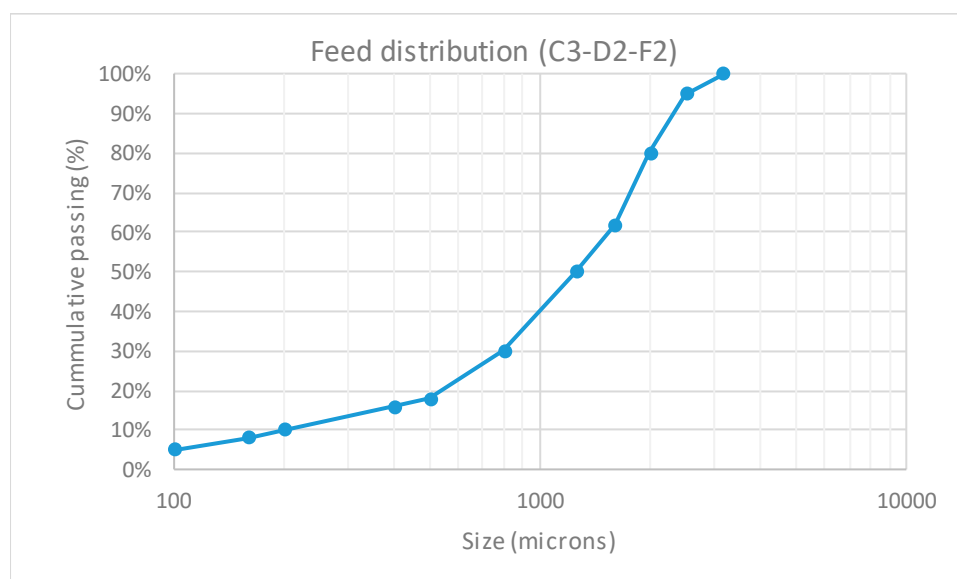

**Figure S23.** Feed PSD, test C3-D2-F2.

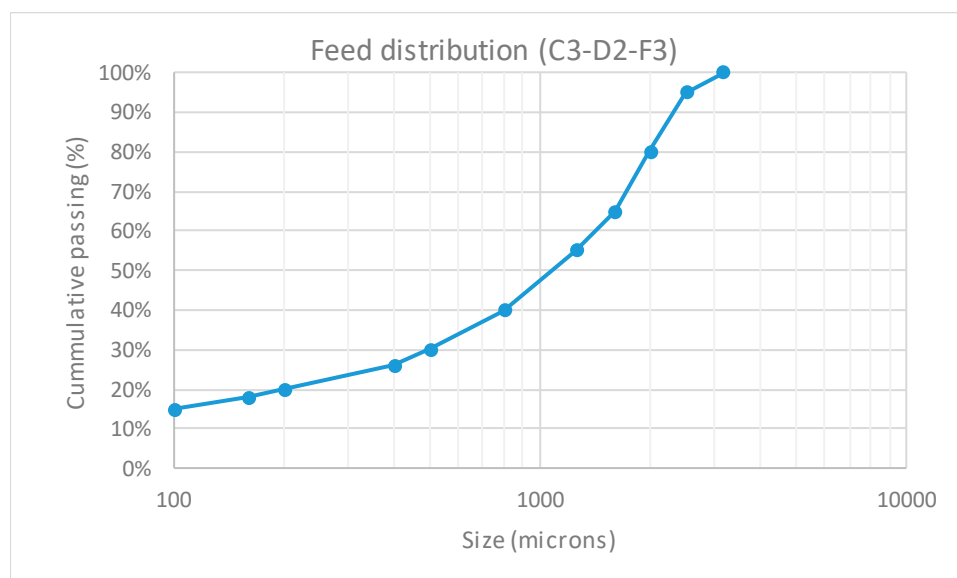

**Figure S24.** Feed PSD, test C3-D2-F3.

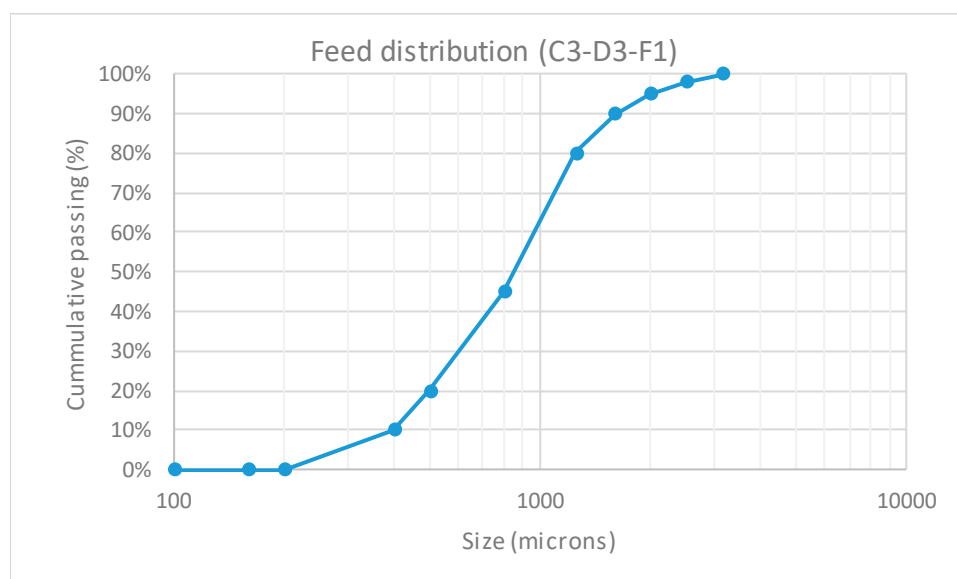

**Figure S25.** Feed PSD, test C3-D3-F1.

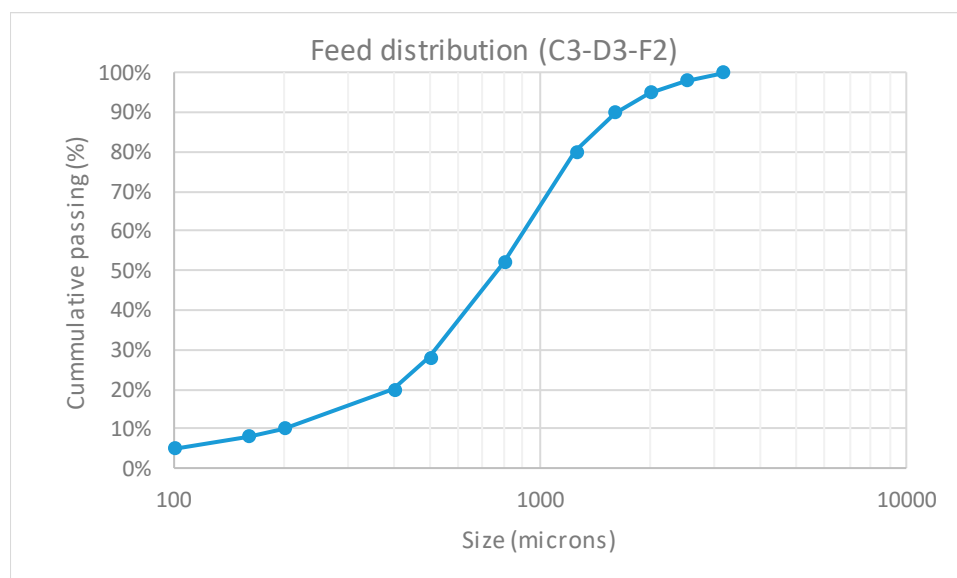

**Figure S26.** Feed PSD, test C3-D3-F2.

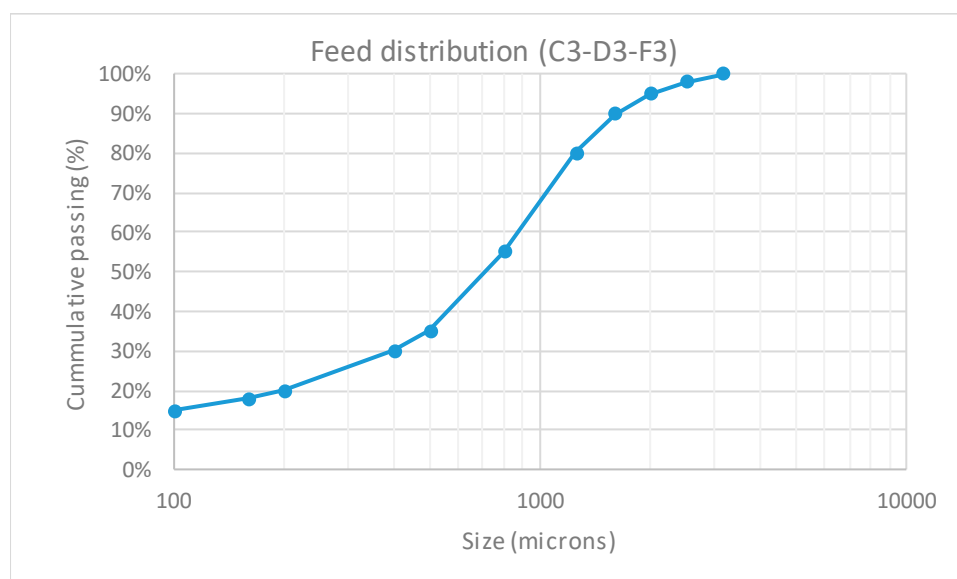

Figure S27. Feed PSD, test C3-D3-F3.

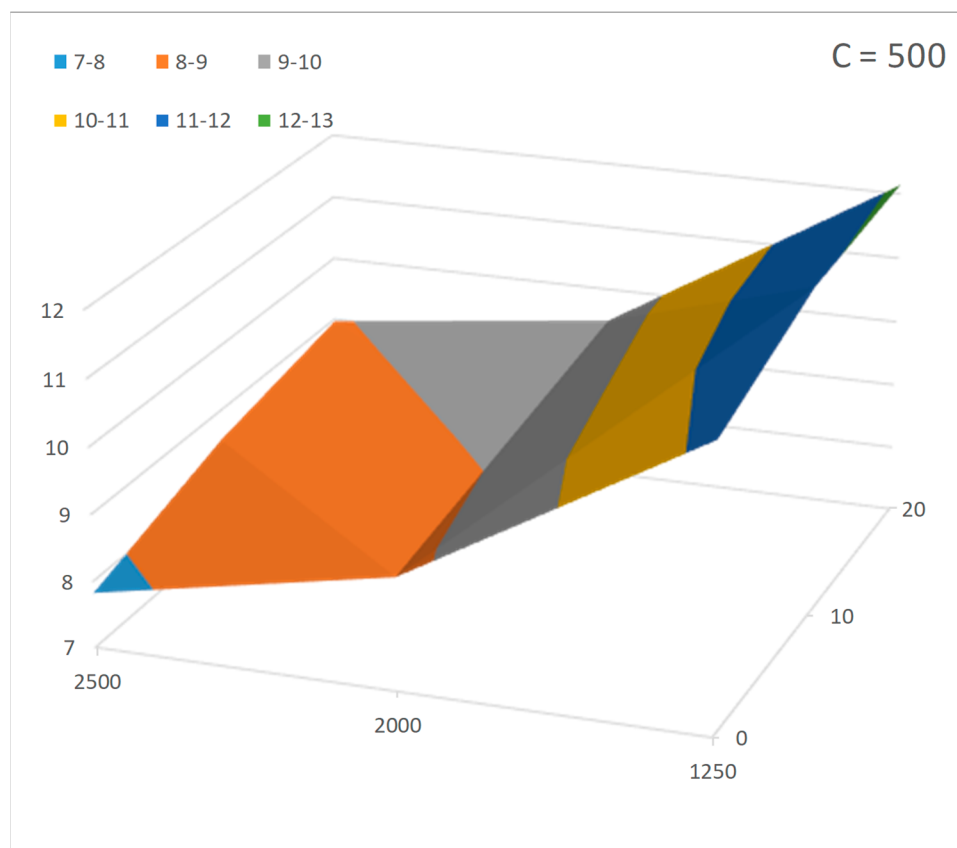

Figure S28. Variability of  $w_i$  [kWh/t] ( $P_{100} = 500 \mu\text{m}$ ).

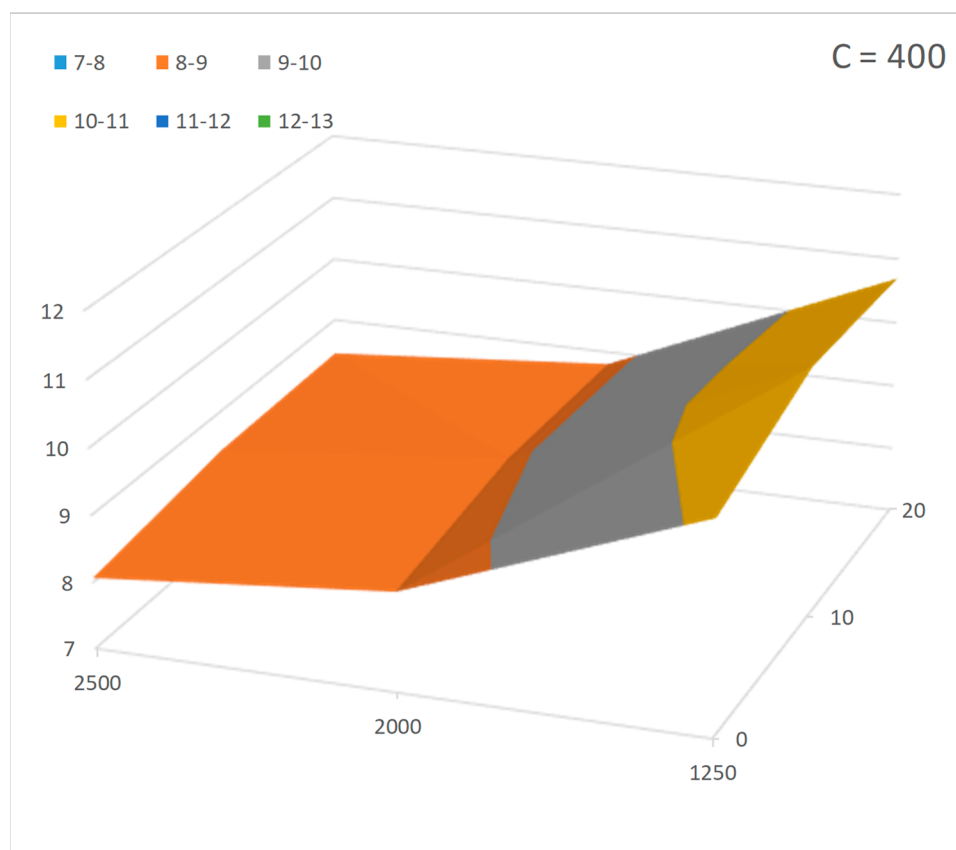

Figure S29. Variability of  $w_i$  [kWh/t] ( $P_{100} = 400 \mu\text{m}$ ).

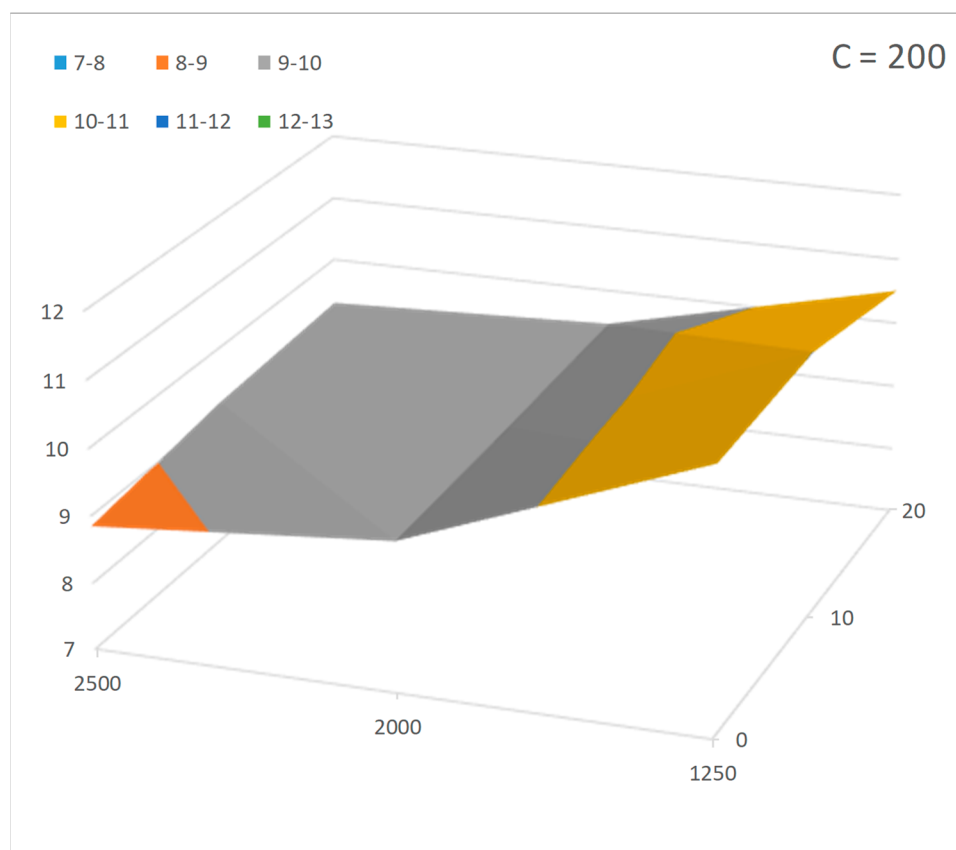

Figure S30. Variability of  $w_i$  [kWh/t] ( $P_{100} = 200 \mu\text{m}$ ).

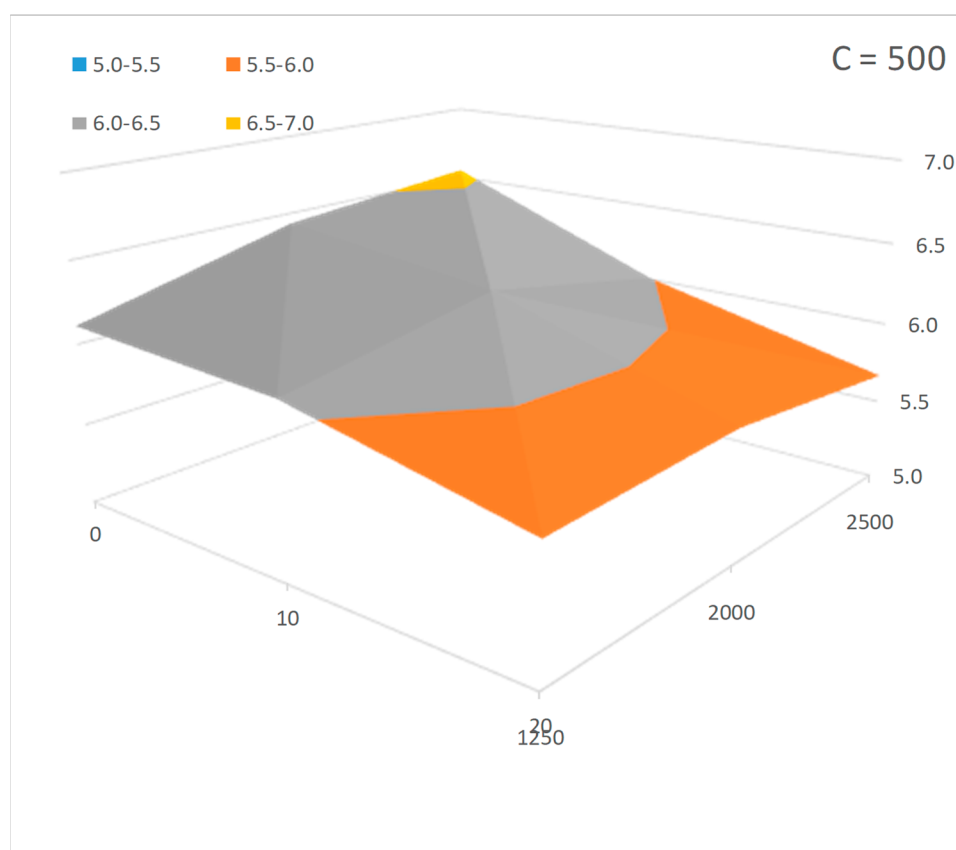

**Figure S31.** Variability of  $gbp$  [g/rev] ( $P_{100} = 500 \mu m$ ).

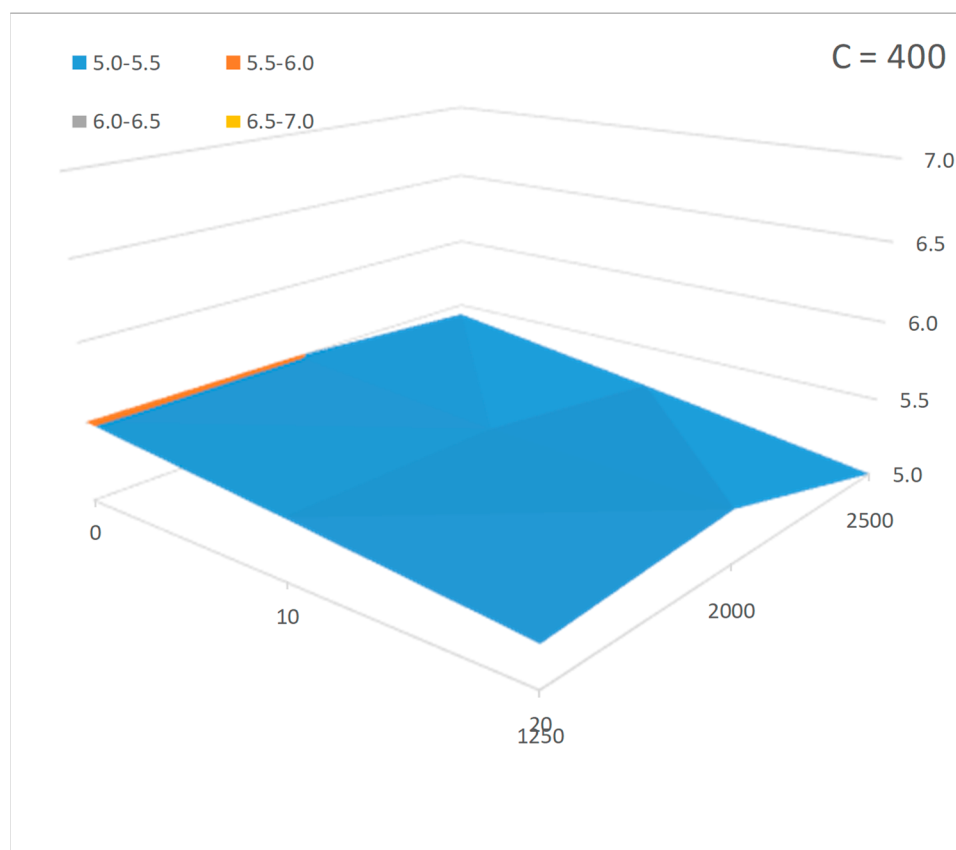

**Figure S32.** Variability of  $gbp$  [g/rev] ( $P_{100} = 400 \mu m$ ).

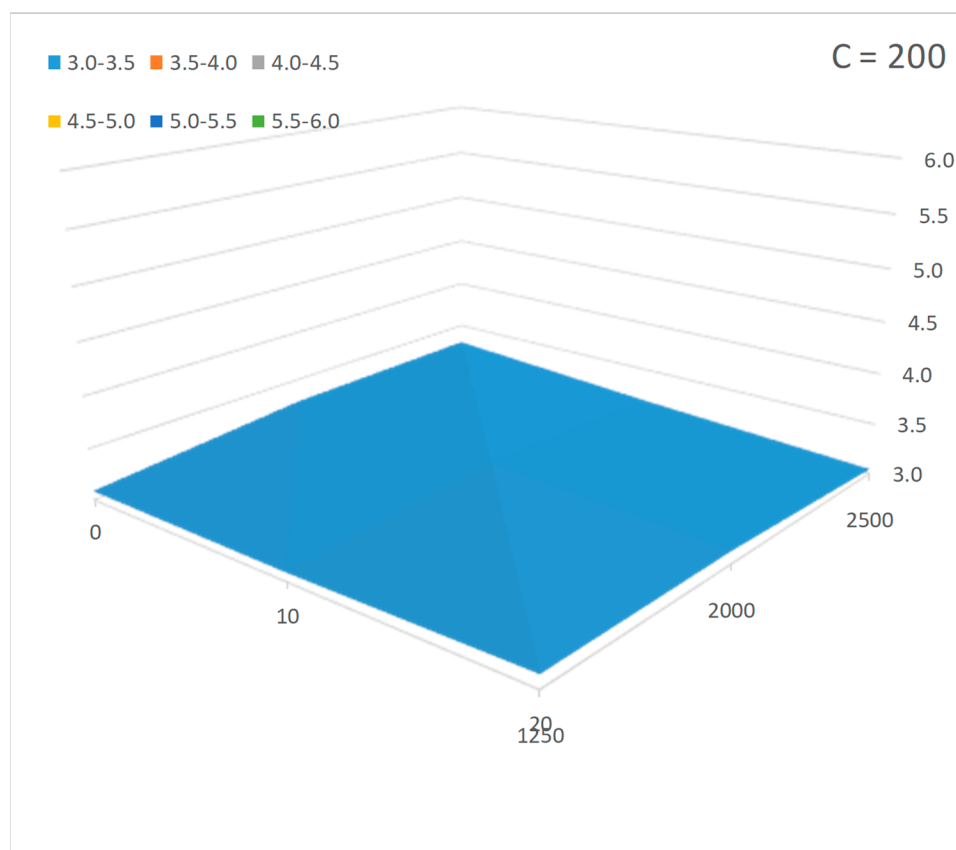

**Figure S33.** Variability of  $g_{bp}$  [g/rev] ( $P_{100} = 200 \mu\text{m}$ ).
